# Supplementary material for: Efficacy of immunotherapy in older patients with triple-negative breast cancer: a systematic review
Source: Research Square preprint supplement (doi:10.21203/rs.3.rs-7024355/v1), 2025-08-01
Supplement: Supplementary file 2 [file d7e8ab73749833929991d3db.docx]

**Ovid Medline ALL Search, 9/7/23**289 ResultsOvid MEDLINE(R) ALL 1946 to September 06, 2023

| 1 | exp "Immune Checkpoint Inhibitors"/ or ICB.ti,ab,kf. or ICBs.ti,ab,kf. or ICI.ti,ab,kf. or ICIs.ti,ab,kf. or PD-1i.ti,ab,kf. or PD-1is.ti,ab,kf. or PD1i.ti,ab,kf. or PD1is.ti,ab,kf. or PD-L1i.ti,ab,kf. or PD-L1is.ti,ab,kf. or PDL1i.ti,ab,kf. or PDL1is.ti,ab,kf. or ((antiPD1* or antiPDL1* or checkpoint* or PD-L1 or PD-L1s or PDL1* or PD-1 or PD-1s or PD1 or PD1s or "programmed death-ligand 1") adj5 (blockade* or blocker* or inhibitor* or therap* or treatment*)).ti,ab,kf. | 66,464 |
| --- | --- | --- |
| 2 | atezolizumab.nm. or 1380723-44-3.rn. or atezolizumab.ti,ab,kf. or 1380723*.ti,ab,kf. or "mpdl 3280a".ti,ab,kf. or mpdl3280a.ti,ab,kf. or "rg 7446".ti,ab,kf. or rg7446.ti,ab,kf. or "ro 5541267".ti,ab,kf. or ro5541267.ti,ab,kf. or tecentriq.ti,ab,kf. or tecntriq.ti,ab,kf. | 3,171 |
| 3 | durvalumab.nm. or 1428935-60-7.rn. or durvalumab.ti,ab,kf. or 1428935*.ti,ab,kf. or imfinzi.ti,ab,kf. or "medi 4736".ti,ab,kf. or medi4736.ti,ab,kf. | 1,564 |
| 4 | pembrolizumab.nm. or 1374853-91-4.rn. or pembrolizumab.ti,ab,kf. or "1374853".ti,ab,kf. or "bcd 201".ti,ab,kf. or bcd201.ti,ab,kf. or keytruda.ti,ab,kf. or lambrolizumab.ti,ab,kf. or "mk 3475".ti,ab,kf. or mk3475.ti,ab,kf. or "pbp 2102".ti,ab,kf. or pbp2102.ti,ab,kf. or "sch 900475".ti,ab,kf. or sch900475.ti,ab,kf. or xtrudane.ti,ab,kf. | 9,110 |
| 5 | 1 or 2 or 3 or 4 | 71,044 |
| 6 | exp Breast/ or exp "Breast Neoplasms"/ or Breast*.ti,ab,kf. or aTNBC*.ti,ab,kf. or DCIS*.ti,ab,kf. or ERPBC*.ti,ab,kf. or ERNBC*.ti,ab,kf. or HBOC*.ti,ab,kf. or HRNBC*.ti,ab,kf. or HRPBC*.ti,ab,kf. or IBC.ti,ab,kf. or IBCs.ti,ab,kf. or IDC.ti,ab,kf. or IDCs.ti,ab,kf. or ILBC*.ti,ab,kf. or LCIS*.ti,ab,kf. or mamma.ti,ab,kf. or mammar*.ti,ab,kf. or mTNBC*.ti,ab,kf. or nipple*.ti,ab,kf. or Paget*.ti,ab,kf. or phyllodes.ti,ab,kf. or PRNBC*.ti,ab,kf. or PRPBC*.ti,ab,kf. or TNBC*.ti,ab,kf. or TPBC*.ti,ab,kf. | 668,630 |
| 7 | (Randomized Controlled Trial or Controlled Clinical Trial or Pragmatic Clinical Trial or Equivalence Trial or Clinical Trial).pt. or exp Clinical Trial/ or Random Allocation/ or Double-Blind Method/ or Single-Blind Method/ or Placebos/ or Control Groups/ or (random* or sham or placebo*).ti,ab,hw,kf. or ((singl* or doubl*) adj (blind* or dumm* or mask*)).ti,ab,hw,kf. or ((tripl* or trebl*) adj (blind* or dumm* or mask*)).ti,ab,hw,kf. or (control* adj3 (study or studies or trial* or group*)).ti,ab,kf. or (Nonrandom* or non-random* or quasi-random* or quasirandom*).ti,ab,hw,kf. or allocated.ti,ab,hw. or (open-label adj5 (study or studies or trial*)).ti,ab,hw,kf. or ((equivalence or superiority or non-inferiority or noninferiority) adj3 (study or studies or trial*)).ti,ab,hw,kf. or (pragmatic study or pragmatic studies).ti,ab,hw,kf. or ((pragmatic or practical) adj3 trial*).ti,ab,hw,kf. or ((quasiexperimental or quasi-experimental) adj3 (study or studies or trial*)).ti,ab,hw,kf. or (phase adj3 (study or studies or trial*)).ti,hw,kf. | 2,871,675 |
| 8 | 5 and 6 and 7 | 395 |
| 9 | 8 not (exp animals/ not humans.sh.) not review.pt. | 325 |
| 10 | limit 9 to (english language and yr="2013 -Current") | 289 |

**Embase (Elsevier) Search, 9/7/23**576 Results

| 1 | 'checkpoint inhibitor therapy'/exp OR 'immune checkpoint inhibitor'/exp OR icb:ti,ab,kw OR icbs:ti,ab,kw OR ici:ti,ab,kw OR icis:ti,ab,kw OR 'pd 1i':ti,ab,kw OR 'pd 1is':ti,ab,kw OR pd1i:ti,ab,kw OR pd1is:ti,ab,kw OR 'pd l1i':ti,ab,kw OR 'pd l1is':ti,ab,kw OR pdl1i:ti,ab,kw OR pdl1is:ti,ab,kw OR (((antipd1* OR antipdl1* OR checkpoint* OR 'pd l1' OR 'pd l1s' OR pdl1* OR 'pd 1' OR 'pd 1s' OR pd1 OR pd1s OR 'programmed death-ligand 1') NEAR/5 (blockade* OR blocker* OR inhibitor* OR therap* OR treatment*)):ti,ab,kw) | 104,516 |
| --- | --- | --- |
| 2 | 'atezolizumab'/exp OR atezolizumab:ti,ab,kw OR 1380723*:ti,ab,kw OR 'mpdl 3280a':ti,ab,kw OR mpdl3280a:ti,ab,kw OR 'rg 7446':ti,ab,kw OR rg7446:ti,ab,kw OR 'ro 5541267':ti,ab,kw OR ro5541267:ti,ab,kw OR tecentriq:ti,ab,kw OR tecntriq:ti,ab,kw | 15,941 |
| 3 | 'durvalumab'/exp OR durvalumab:ti,ab,kw OR 1428935*:ti,ab,kw OR imfinzi:ti,ab,kw OR 'medi 4736':ti,ab,kw OR medi4736:ti,ab,kw | 10,582 |
| 4 | 'pembrolizumab'/exp OR pembrolizumab:ti,ab,kw OR 1374853:ti,ab,kw OR 'bcd 201':ti,ab,kw OR bcd201:ti,ab,kw OR keytruda:ti,ab,kw OR lambrolizumab:ti,ab,kw OR 'mk 3475':ti,ab,kw OR mk3475:ti,ab,kw OR 'pbp 2102':ti,ab,kw OR pbp2102:ti,ab,kw OR 'sch 900475':ti,ab,kw OR sch900475:ti,ab,kw OR xtrudane:ti,ab,kw | 38,195 |
| 5 | #1 OR #2 OR #3 OR #4 | 126,900 |
| 6 | 'breast'/exp OR 'breast cancer'/exp OR breast*:ti,ab,kw OR atnbc*:ti,ab,kw OR dcis*:ti,ab,kw OR erpbc*:ti,ab,kw OR ernbc*:ti,ab,kw OR hboc*:ti,ab,kw OR hrnbc*:ti,ab,kw OR hrpbc*:ti,ab,kw OR ibc:ti,ab,kw OR ibcs:ti,ab,kw OR idc:ti,ab,kw OR idcs:ti,ab,kw OR ilbc*:ti,ab,kw OR lcis*:ti,ab,kw OR mamma:ti,ab,kw OR mammar*:ti,ab,kw OR mtnbc*:ti,ab,kw OR nipple*:ti,ab,kw OR paget*:ti,ab,kw OR phyllodes:ti,ab,kw OR prnbc*:ti,ab,kw OR prpbc*:ti,ab,kw OR tnbc*:ti,ab,kw OR tpbc*:ti,ab,kw | 974,886 |
| 7 | 'randomized controlled trial'/exp OR 'clinical trial'/de OR 'adaptive clinical trial'/de OR 'controlled clinical trial'/exp OR 'phase 1 clinical trial'/de OR 'phase 2 clinical trial'/de OR 'phase 3 clinical trial'/de OR 'phase 4 clinical trial'/de OR 'pragmatic trial'/exp OR 'randomization'/de OR 'double blind procedure'/exp OR 'single blind procedure'/exp OR 'placebo'/exp OR 'control group'/exp OR random*:ti,ab,kw OR sham:ti,ab,kw OR placebo*:ti,ab,kw OR (((singl* OR doubl*) NEXT/1 (blind* OR dumm* OR mask*)):ti,ab,kw) OR (((tripl* OR trebl*) NEXT/1 (blind* OR dumm* OR mask*)):ti,ab,kw) OR ((control* NEAR/3 (study OR studies OR trial* OR group*)):ti,ab,kw) OR nonrandom*:ti,ab,kw OR 'non random*':ti,ab,kw OR 'quasi random*':ti,ab,kw OR quasirandom*:ti,ab,kw OR allocated:ti,ab OR ((('open label' OR 'open label') NEAR/5 (study OR studies OR trial*)):ti,ab,kw) OR (((equivalence OR superiority OR 'non inferiority' OR noninferiority) NEAR/3 (study OR studies OR trial*)):ti,ab,kw) OR 'pragmatic study':ti,ab,kw OR 'pragmatic studies':ti,ab,kw OR (((pragmatic OR practical) NEAR/3 trial*):ti,ab,kw) OR (((quasiexperimental OR 'quasi experimental') NEAR/3 (study OR studies OR trial*)):ti,ab,kw) OR ((phase NEAR/3 (study OR studies OR trial*)):ti,kw) | 4,158,028 |
| 8 | #5 AND #6 AND #7 | 2,640 |
| 9 | #8 NOT ([animals]/lim NOT [humans]/lim) NOT ([conference abstract]/lim OR [conference review]/lim OR [review]/lim) | 631 |
| 10 | #9 AND [english]/lim AND [2013-2023]/py | 576 |

**Cochrane Central Register of Controlled Trials (Wiley) Search, 9/7/23**Issue 8 of 12, August 2023
702 Results

| 1 | ICB:ti,ab,kw OR ICBs:ti,ab,kw OR ICI:ti,ab,kw OR ICIs:ti,ab,kw OR PD-1i:ti,ab,kw OR PD-1is:ti,ab,kw OR PD1i:ti,ab,kw OR PD1is:ti,ab,kw OR PD-L1i:ti,ab,kw OR PD-L1is:ti,ab,kw OR PDL1i:ti,ab,kw OR PDL1is:ti,ab,kw OR ((antiPD1*:ti,ab,kw OR antiPDL1*:ti,ab,kw OR checkpoint*:ti,ab,kw OR PD-L1:ti,ab,kw OR PD-L1s:ti,ab,kw OR PDL1*:ti,ab,kw OR PD-1:ti,ab,kw OR PD-1s:ti,ab,kw OR PD1:ti,ab,kw OR PD1s:ti,ab,kw OR "programmed death-ligand 1":ti,ab,kw) NEAR/5 (blockade*:ti,ab,kw OR blocker*:ti,ab,kw OR inhibitor*:ti,ab,kw OR therap*:ti,ab,kw OR treatment*:ti,ab,kw)) | 4,907 |
| --- | --- | --- |
| 2 | atezolizumab:ti,ab,kw OR 1380723*:ti,ab,kw OR "mpdl 3280a":ti,ab,kw OR mpdl3280a:ti,ab,kw OR "rg 7446":ti,ab,kw OR rg7446:ti,ab,kw OR "ro 5541267":ti,ab,kw OR ro5541267:ti,ab,kw OR tecentriq:ti,ab,kw OR tecntriq:ti,ab,kw | 1,354 |
| 3 | durvalumab:ti,ab,kw OR 1428935*:ti,ab,kw OR imfinzi:ti,ab,kw OR "medi 4736":ti,ab,kw OR medi4736:ti,ab,kw | 1,075 |
| 4 | pembrolizumab:ti,ab,kw OR 1374853:ti,ab,kw OR "bcd 201":ti,ab,kw OR bcd201:ti,ab,kw OR keytruda:ti,ab,kw OR lambrolizumab:ti,ab,kw OR "mk 3475":ti,ab,kw OR mk3475:ti,ab,kw OR "pbp 2102":ti,ab,kw OR pbp2102:ti,ab,kw OR "sch 900475":ti,ab,kw OR sch900475:ti,ab,kw OR xtrudane:ti,ab,kw | 2,872 |
| 5 | #1 OR #2 OR #3 OR #4 | 8,191 |
| 6 | Breast*:ti,ab,kw OR aTNBC*:ti,ab,kw OR DCIS*:ti,ab,kw OR ERPBC*:ti,ab,kw OR ERNBC*:ti,ab,kw OR HBOC*:ti,ab,kw OR HRNBC*:ti,ab,kw OR HRPBC*:ti,ab,kw OR IBC:ti,ab,kw OR IBCs:ti,ab,kw OR IDC:ti,ab,kw OR IDCs:ti,ab,kw OR ILBC*:ti,ab,kw OR LCIS*:ti,ab,kw OR mamma:ti,ab,kw OR mammar*:ti,ab,kw OR mTNBC*:ti,ab,kw OR nipple*:ti,ab,kw OR Paget*:ti,ab,kw OR phyllodes:ti,ab,kw OR PRNBC*:ti,ab,kw OR PRPBC*:ti,ab,kw OR TNBC*:ti,ab,kw OR TPBC*:ti,ab,kw | 63,904 |
| 7 | #5 AND #6 | 746 |
|  | with Publication Year from 2013 to 2023, in Trials, Language: English | 702 |

**ClinicalTrials.gov Search, 9/7/23**65 Results

**Condition or disease:** "breast cancer"
**Intervention/Treatment:** "immune checkpoint inhibitor" OR atezolizumab OR durvalumab OR pembrolizumab
**Study results:** With results **First posted from** 01/01/2013 to 12/31/2023

**WHO ICTRP (**[**https://trialsearch.who.int/**](https://trialsearch.who.int/AdvSearch.aspx)**)** **Search, 9/7/23**63 records for 33 trials

**Condition:** "breast cancer"
**AND
Intervention:** "immune checkpoint inhibitor" OR atezolizumab OR durvalumab OR pembrolizumab
**Recruitment status:** ALL
**Date of Registration is between:** 01/01/2013 to 31/12/2023
**With results only**
