# Supplementary material for: Efficacy of immunotherapy in older patients with triple-negative breast cancer: a systematic review
Source: Research Square preprint supplement (doi:10.21203/rs.3.rs-7024355/v1), 2025-08-01
Supplement: Supplementary file 3 [file f3b89dc20c6cf33c129b47db.xlsx]

## Sheet: All study characteristics
Paper title	Author	Year	Trial	Stage	Immunotherapy	Chemo backbone	Follow-up time	Total Population (n)	Primary endpoint(s)	Overall results	Overall results	Age range (median)**	≥ 65 (n)	Results for ≥ 65	Results for ≥ 65
Pembrolizumab for Early Triple-Negative Breast Cancer	Schmid et al.	2020	KEYNOTE 522 (interim)	Early	Pembrolizumab	Carboplatin/paclitaxel followed by doxorubicin/cyclophosphamide or epirubicin/cyclophosphamide	15.5 months	602	pCR, EFS	pCR: 64.8% in the pembrolizumab-chemotherapy group and 51.2% in the placebo-chemotherapy group. Estimated treatment difference of 13.6% (95% CI 5.4 to 21.8, p<0.001)	pCR and EFS: Favors pembrolizumab-chemotherapy	22 - 80 (49, 48)	71	pCR: estimated treatment difference 22.3% (95% CI -2.1 to 43.5)	pCR: No difference
Event-free Survival with Pembrolizumab in Early Triple-Negative Breast Cancer	Schmid et al.	2022	KEYNOTE 522 (final)	Early	Pembrolizumab	Carboplatin/paclitaxel followed by doxorubicin/cyclophosphamide or epirubicin/cyclophosphamide	39.1 months	1174	EFS	EFS: 84.5% in the pembrolizumab–chemotherapy group and 76.8% in the placebo–chemotherapy group. Hazard ratio for event or death, 0.63 (95% CI, 0.48 to 0.82; P<0.001)	Favors pembrolizumab-chemotherapy	22 - 80 (49, 48)	132	EFS: HR 0.79 (95% CI 0.40 - 1.56)	No difference
Neoadjuvant atezolizumab in combination with sequential nab-paclitaxel and anthracycline-based chemotherapy versus placebo and chemotherapy in patients with early-stage triple-negative breast cancer (IMpassion031): a randomised, double-blind, phase 3 trial	Mittendorf et al.	2020	IMPASSION 031	Early	Atezolizumab	Nab-paclitaxel followed by doxorubicin/cyclophosphamide	20.6 months	333	pCR in ITT and PD-L1 positive populations	pCR in ITT: 58% in the atezolizumab-chemotherapy group and 41% in the placebo-chemotherapy group. Rate difference 17% (95% CI, 6–27; one-sided p=0.0044) pCR in PD-L1+: 69% in the atezolizumab-chemotherapy group and 49% in the placebo-chemotherapy group. Rate difference 20% (95% CI 4–35; one-sided p=0.021)	Favors atezolizumab-chemotherapy	22 - 78 (51)	N/A	N/A	N/A
Subgroup analysis of Japanese patients in a phase III randomized, controlled study of neoadjuvant atezolizumab or placebo, combined with nab-paclitaxel and anthracycline-based chemotherapy in early triple-negative breast cancer (IMpassion031).	Saji et al.	2022	IMPASSION 031 (Japanese subpopulation)	Early	Atezolizumab	Nab-paclitaxel followed by doxorubicin/cyclophosphamide	22 months	36	pCR in ITT and PD-L1 positive populations	pCR in ITT: 41% in the atezolizumab-chemotherapy group and 37% in the placebo-chemotherapy group. Rate difference 4% (95% CI, -28 to 36) pCR in PD-L1+: 50% in the atezolizumab-chemotherapy group and 45% in the placebo-chemotherapy group. Rate difference 5% (95% CI, -38 to 47)	No difference	30 - 70 (51, 54)	6	N/A	N/A
A randomized phase 2 study of neoadjuvant carboplatin and paclitaxel with or without atezolizumab in triple negative breast cancer (TNBC) - NCI 10013	Ademuyiwa et al.	2022	NCI-10013	Early	Atezolizumab	Carboplatin/paclitaxel	6.6 months	67	pCR	pCR: 55.6% in the atezolizumab-chemotherapy group and 18.8% in the chemotherapy alone group. Estimated treatment difference: 36.8% (95% CI 8.5–56.6%; p = 0.018)	Favors atezolizumab-chemotherapy	25 - 78 (52)	N/A	N/A	N/A
Pathologic complete response (pCR) to neoadjuvant treatment with or without atezolizumab in triple-negative, early high-risk and locally advanced breast cancer: NeoTRIP Michelangelo randomized study	Gianni et al.	2022	NeoTRIP Michelangelo	Early	Atezolizumab	Carboplatin/nab-paclitaxel	Ongoing	280	EFS; only pCR (secondary endpoint) is reported	pCR in ITT: 48.6% in the atezolizumab-chemotherapy group and 44.4% in the chemotherapy alone group. OR: 1.18 (95% CI 0.74-1.89; p = 0.48) pCR in PD-L1+: 59.5% in the atezolizumab-chemotherapy group and 51.9% in the chemotherapy alone group. OR: 1.36 (95% CI 0.72-2.56)	pCR: No difference	24 - 79 (50)	N/A	N/A	N/A
Neoadjuvant durvalumab improves survival in early triple-negative breast cancer independent of pathological complete response	Loibl et al.	2022	Gepar Nuevo	Early	Durvalumab	Nab-paclitaxel followed by epirubicin/cyclophosphamide	43.7 months	174	pCR	pCR: 53.4% in the durvalumab-chemotherapy group and 44.2% in the placebo-chemotherapy group. OR: 1.45 (95% CI 0.80–2.63, unadjusted Wald P = 0.224) OS: 95.2% in the durvalumab-chemotherapy group and 83.5% in the placebo-chemotherapy group. OR: 0.24 (95% CI 0.08-0.72, p = 0.006)	No difference	N/A	N/A	N/A	N/A
Pembrolizumab versus investigator-choice chemotherapy for metastatic triple-negative breast cancer (KEYNOTE-119): a randomised, open-label, phase 3 trial	Winer et al.	2021	KEYNOTE 119	Metastatic	Pembrolizumab	None	31 months	622	OS	OS in ITT: 9.9 months in the pembrolizumab group and 10.8 months in the chemotherapy group. HR 0.97 (95% CI 0.82–1.15). OS in PD-L1 CPS ≥1: 10.7 months in the pembrolizumab group and 10.2 months in the chemotherapy group. HR 0.85 (95% CI 0.69–1.05, log-rank p=0.073) OS in PD-L1 CPS ≥10: 12.7 months in the pembrolizumab group and 11.6 months in the chemotherapy group. HR 0.78 95% CI 0.57–1.06, log…	No difference	IQR 43 - 61 (50, 53)	98	N/A	N/A
Pembrolizumab plus chemotherapy versus placebo plus chemotherapy for previously untreated locally recurrent inoperable or metastatic triple-negative breast cancer (KEYNOTE-355): a randomised, placebo-controlled, double-blind, phase 3 clinical trial.	Cortes et al.	2020	KEYNOTE 355 (interim)	Metastatic	Pembrolizumab	Nab-paclitaxel or paclitaxel or gemcitabine/carboplatin	26 months	847	PFS	PFS in ITT: 7.5 months in the pembrolizumab-chemotherapy group and 5.6 months in the placebo-chemotherapy group. HR for progression or death: 0.82 (95% CI 0.69–0.97, p = N/A) PFS in PD-L1 CPS ≥ 1: 7.6 months in the pembrolizumab-chemotherapy group and 5.6 months in the placebo-chemotherapy group. HR 0.74 (95% CI 0.61–0.90, one-sided p=0.0014 [not significant]) PFS in PD-L1 CPS ≥ 10: 9.7 months in…	Favors pembrolizumab-chemotherapy in PD-L1 CPS ≥ 10	22 - 85 (53)	180	ITT: 9.2 months vs 6.2 months, HR 0.72 (0.49 to 1.05, p = N/A) CPS ≥1: 8.2 months vs 6.6 months, HR 0.69 (0.45 to 1.07, p = N/A) CPS ≥10:10.7 months vs 7.6 months, HR 0.67 (0.37 to 1.23, p = N/A)	No difference
Pembrolizumab plus Chemotherapy in Advanced Triple-Negative Breast Cancer	Cortes et al.	2022	KEYNOTE 355 (final)	Metastatic	Pembrolizumab	Nab-paclitaxel or paclitaxel or gemcitabine/carboplatin	44.1 months	847	OS	OS in ITT: 17.2 in the pembrolizumab-chemotherapy group and 15.5 months in the placebo-chemotherapy group. HR 0.89 (95% CI 0.76 to 1.05, p = N/A) OS in PD-L1 CPS ≥ 1:17.6 in the pembrolizumab-chemotherapy group and 16.0 months in the placebo-chemotherapy group. HR 0.86 (95% CI 0.72 to 1.04, two-sided p=0.1125) OS in PD-L1 CPS ≥ 10: 23.0 months in the pembrolizumab–chemotherapy group and 16.1 mont…	Favors pembrolizumab-chemotherapy in PD-L1 CPS ≥ 10	22 - 85 (53)	180	ITT: 19.0 months vs 13.0 months, HR 0.79 (0.56 - 1.12, p = N/A) CPS ≥1: 17.7 months vs 12.6 months, HR 0.81 (0.54 -1.22, p = N/A) CPS ≥10: 28.3 months vs 12.6 months, HR 0.51 (0.28 - 0.92), no p-value	Favors pembrolizumab-chemotherapy in PD-L1 CPS ≥ 10
Q-TWiST analysis of pembrolizumab combined with chemotherapy as first-line treatment of metastatic triple-negative breast cancer that expresses PD-L1.	Huang et al.	2022	KEYNOTE 355 Q-TWiST	Metastatic	Pembrolizumab	Nab-paclitaxel or paclitaxel or gemcitabine/carboplatin	44 months	323	Q-TWiST	Q-TWiST: 19.5 months in the pembrolizumab-chemotherapy grioup and 15.8 months in the placebo-chemotherapy group. Relative gain of 18% (p = 0.003)	Favors pembrolizumab-chemotherapy	N/A	N/A	N/A	N/A
Pembrolizumab plus chemotherapy in Japanese patients with triple-negative breast cancer: Results from KEYNOTE-355	Hattori et al.	2023	KEYNOTE 355 (Japanese subpopulation)	Metastatic	Pembrolizumab	Nab-paclitaxel or paclitaxel or gemcitabine/carboplatin	44.7 months	87	PFS, OS	OS in ITT: 25.1 months in the pembrolizumab-chemotherapy group and 17.1 months in the placebo-chemotherapy group (HR 0.46, 95% CI 0.28-0.77) OS in PD-L1 CPS ≥ 10: 25.9 months in the pembrolizumab-chemotherapy group and 18.2 months months in the placebo-chemotherapy group (HR 0.36, 95% CI 0.14-0.89)	OS: Favors pembrolizumab-chemotherapy*	25 - 76 (54, 51)	21	N/A	N/A
Atezolizumab plus anthracycline-based chemotherapy in metastatic triple-negative breast cancer: the randomized, double-blind phase 2b ALICE trial	Rossevold et al.	2022	ALICE	Metastatic	Atezolizumab	Pegylated liposomal doxorubicin/cyclophosphamide	32.2 months	68	PFS	PFS in PPP: 4.3 months in atezolizumab-chemotherapy group versus 3.5 months in placebo-chemotherapy group. HR 0.57, 95% CI 0.33–0.99, log-rank P = 0.047)	Favors atezolizumab-chemotherapy	28 - 77 (59, 52)	N/A	N/A	N/A
Atezolizumab and Nab-Paclitaxel in Advanced Triple-Negative Breast Cancer	Schmid et al.	2018	IMPASSION 130 (interim 1)	Metastatic	Atezolizumab	Nab-paclitaxel	12.9 months	902	PFS, OS	PFS in ITT: 7.2 months in the atezolizumab-chemotherapy group and 5.5 months in the placebo-chemotherapy group. HR 0.80 (95% CI, 0.69 to 0.92, p = 0.002) PFS in PD-L1+: 7.5 months in the atezolizumab-chemotherapy group and 5.0 months in the placebo-chemotherapy group. HR 0.62 (95% CI, 0.49 to 0.78, P<0.001) OS in ITT: 21.3 months in the atezolizumab-chemotherapy group and 17.6 months in the place…	PFS: Favors atezolizumab-chemotherapy OS: Favors atezolizumab-chemotherapy in PD-L1+	20 - 86 (55, 56)	219	PFS in ITT: 9.1 months in the atezolizumab-chemotherapy group and 6.2 months in the placebo-chemotherapy group. HR 0.69 (95% CI 0.51 - 0.94, p = N/A)	PFS: Favors atezolizumab-chemotherapy
Atezolizumab plus nab-paclitaxel as first-line treatment for uN/Aesectable, locally advanced or metastatic triple-negative breast cancer (IMpassion130): updated efficacy results from a randomised, double-blind, placebo-controlled, phase 3 trial	Schmid et al.	2020	IMPASSION 130 (interim 2)	Metastatic	Atezolizumab	Nab-paclitaxel	18.5 months	902	OS	OS in ITT: 21.0 months in the atezolizumab-chemotherapy group and 18.7 months in the placebo-chemotherapy group. HR 0.86 (95% CI 0.72–1.02, p=0.078) OS in PD-L1+: 25.0 months in the atezolizumab-chemotherapy group and 18.0 months in the placebo-chemotherapy group. HR 0.71 (95% CI 0.54–0.94, p = N/A)	Favors atezolizumab-chemotherapy in PD-L1+	20 - 86 (55, 56)	219	OS in ITT: 21.9 months in the atezolizumab-chemotherapy group and 19.4 months in the placebo-chemotherapy group. HR 0.78 (95% CI 0.55 - 1.12, p = N/A) OS in PD-L1+: 30.7 months in the atezolizumab-chemotherapy group and 18.7 months in the placebo-chemotherapy group. HR 0.54 (95% CI 0.29 - 0.98, p = N/A)	Favors atezolizumab-chemotherapy in PD-L1+
First-line atezolizumab plus nab-paclitaxel for uN/Aesectable, locally advanced, or metastatic triple-negative breast cancer: IMpassion130 final overall survival analysis	Emens et al.	2021	IMPASSION 130 (final)	Metastatic	Atezolizumab	Nab-paclitaxel	18.8 months	902	OS	OS in ITT: 21.0 months in the atezolizumab-chemotherapy group and 18.7 months in the placebo-chemotherapy group. HR 0.88 (95% CI 0.76-1.03, p=0.077) OS in PD-L1+: 25.4 months in the atezolizumab-chemotherapy group and 17.9 months in the placebo-chemotherapy group. HR 0.69 (95% CI 0.54-0.88)	Favors atezolizumab-chemotherapy in PD-L1+	20 - 86 (55, 56)	219	OS in ITT: 22.6 months in the atezolizumab-chemotherapy group and 19.6 months in the placebo-chemotherapy group. HR 0.92 (95% CI 0.67-1.26, p = N/A) OS in PD-L1+: 30.7 months in the atezolizumab-chemotherapy group and 18.7 months in the placebo-chemotherapy group. HR 0.67 (95% CI 0.40-1.13, p = N/A)	No difference
Primary results from IMpassion131, a double-blind, placebo-controlled, randomised phase III trial of first-line paclitaxel with or without atezolizumab for uN/Aesectable locally advanced/metastatic triple-negative breast cancer.	Miles et al.	2021	IMPASSION 131 (interim)	Metastatic	Atezolizumab	Paclitaxel	8.5 to 8.8 months	651	PFS, OS	PFS in PD-L1+: 5.9 months in the atezolizumab-chemotherapy group and 5.7 months in the placebo-chemotherapy group. HR 0.84 (95% CI 0.62-1.14, p = 0.20)	PFS and OS: No difference	22 - 85 (54, 53)	72***	PFS in PD-L1+: 9.4 months in the atezolizumab-chemotherapy group and 7.7 months in the placebo-chemotherapy group. HR 0.80 (0.41-1.58, p = N/A)	PFS: No difference
Durvalumab compared to maintenance chemotherapy in metastatic breast cancer: the randomized phase II SAFIR02-BREAST IMMUNO trial.	Bachelot et al.	2021	SAFIR02-BREAST	Metastatic	Durvalumab	Mixed	19.7 months	82	PFS, OS	OS: 21.2 months in the durvalumab-chemotherapy group and 14.0 months in the chemotherapyonly group. HR: 0.54 (95% CI 0.30–0.97, log-rank test p = 0.0377)	OS: Favors durvalumab-chemotherapy	24 - 79 (56)	N/A	N/A	N/A
pCR: pathological complete response; EFS: event-free survival; PFS: progression-free survival; OS: overall survival; Q-TWiST: Quality-adjusted Time Without Symptoms of disease progression or Toxicity of treatment. IQR: interquartile range. ITT: intention-to-treat population. PPP: per-protocol population. P-values were not reported for subgroup analysis of patients ≥65. Results were interpreted ba…
